# Supplementary material for: A novel and sensitive turn-on fluorescent biosensor for the determination of thioctic acid based on Cu2+-modulated N-acetyl-l-cysteine capped CdTe quantum dots
Source: Royal Society of Chemistry journal article supplement (doi:10.1039/c5ra05087a), 2015-01-01
Supplement: c5ra05087a1.pdf [file c5ra05087a1.pdf]

## A novel and sensitive turn-on fluorescent biosensor for the determination of thioctic acid based on Cu<sup>2+</sup>-modulated N-acetyl-L-cysteine capped CdTe quantum dots

Xuanping Tan <sup>a</sup>, Qin Li <sup>b</sup>, Xiaoning Zhang <sup>c</sup>, Yizhong Shen <sup>a</sup>, Jidong Yang <sup>\*a,d</sup>  
<sup>a</sup> School of Chemistry and Chemical Engineering, Southwest University, Chongqing, 400715, China; <sup>b</sup> Chongqing Medical and Health school, Fuling, Chongqing 408100, P. R. China; <sup>c</sup> Department of Mathematics, Sciences & Technology, Paine College, 1235 Fifteenth Street, Augusta, Georgia 30901, United States; <sup>d</sup> School of Chemistry and Environmental Engineering, Chongqing Three Gorges University, Wanzhou, Chongqing 404000, China.

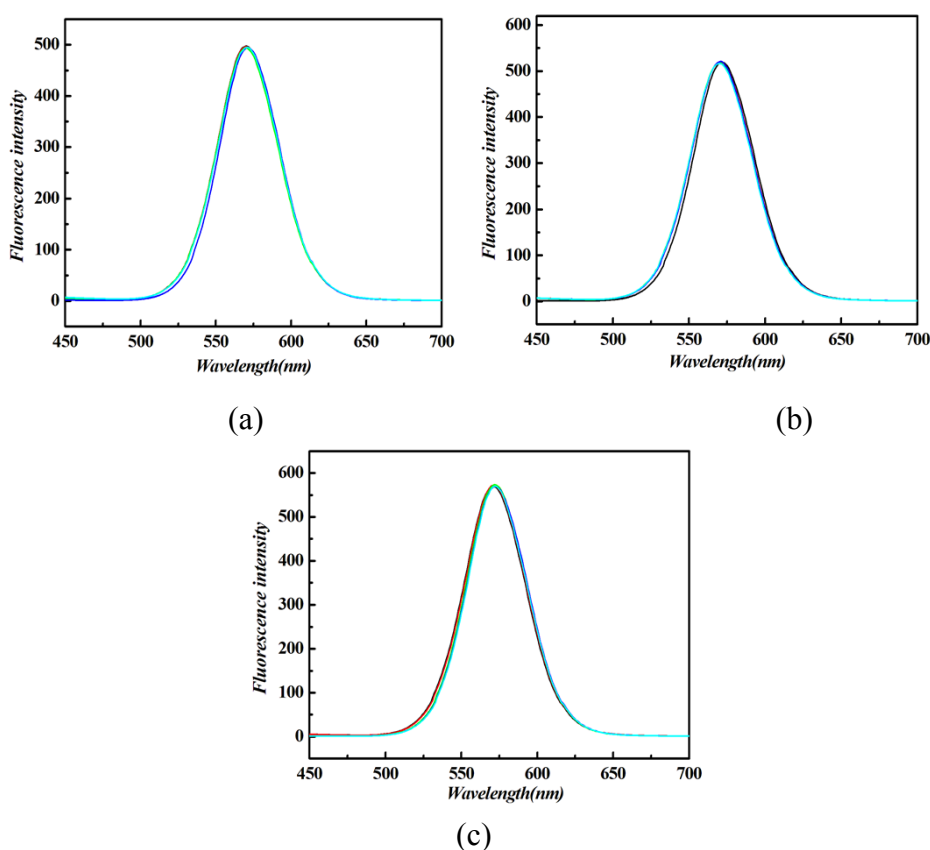

**Fig S1** The fluorescence spectrums of the system of detecting TA in commercial tablets: the added concentration is (a) 8  $\mu\text{g}\cdot\text{mL}^{-1}$ , (b) 12  $\mu\text{g}\cdot\text{mL}^{-1}$ , (c) 20  $\mu\text{g}\cdot\text{mL}^{-1}$ .

---

\*Corresponding author at: School of Chemistry and Chemical Engineering,  
Southwest University, Chongqing, Beibei 400715, China. Tel.: +86 18996678896.  
E-mail address: flyjd6400@163.com (J. Yang).

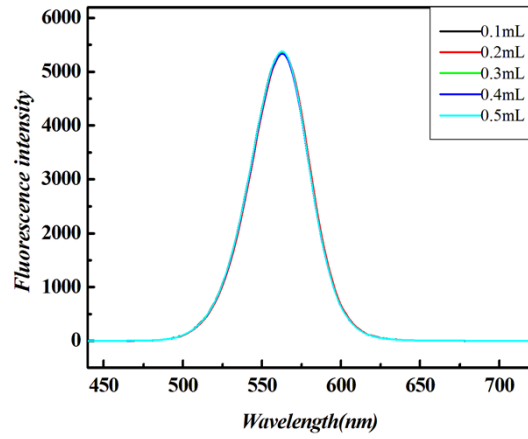

**Fig S2** The effect of plasma on the fluorescence intensity of NALC-CdTe QDs in 1 mL PBS buffer solution at pH=7.6, the volume of the plasma were 0.1, 0.2, 0.3, 0.4, 0.5 mL, respectively.

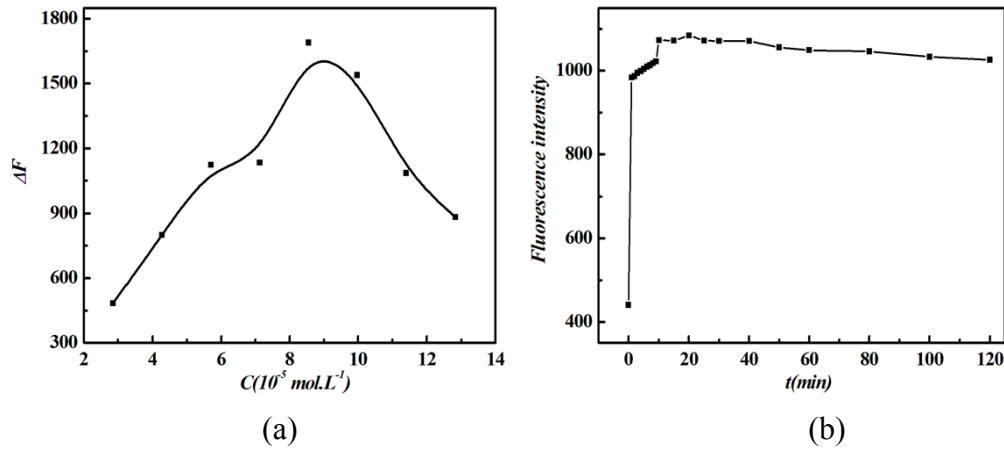

**Fig S3** (a) Effects of CdTe QDs concentration on fluorescence intensity of the QDs- $\text{Cu}^{2+}$  system; (b) Effects of reaction time.
